# Supplementary material for: Parkin loss of function contributes to RTP801 elevation and neurodegeneration in Parkinson's disease
Source: PubMed Central journal article supplement (PMC4454308; doi:10.1038/cddis.2014.333), 2014-08-07

S3

| inputs |   |   |   | IP: Myc |   |   |   |                    |
|--------|---|---|---|---------|---|---|---|--------------------|
| +      | - | - | - | -       | - | - | - | pCMS-eGFP/pRK5-myc |
| -      | + | - | + | -       | - | + | + | pCMS-eGFP RTP801   |
| -      | - | + | + | -       | + | + | + | pRK5-myc Parkin WT |
|        |   |   |   | +       |   |   |   | LB                 |
|        |   |   |   |         | + | - | + | mouse IgG          |
|        |   |   |   |         | - | + | - | Myc antibody       |

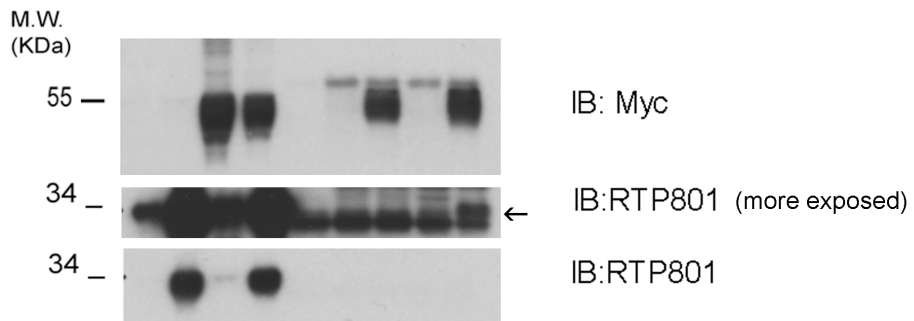

Supplement: cddis2014333x3.pdf [file cddis2014333x3.pdf]
