# Supplementary material for: Parkin loss of function contributes to RTP801 elevation and neurodegeneration in Parkinson's disease
Source: PubMed Central journal article supplement (PMC4454308; doi:10.1038/cddis.2014.333), 2014-08-07

S7

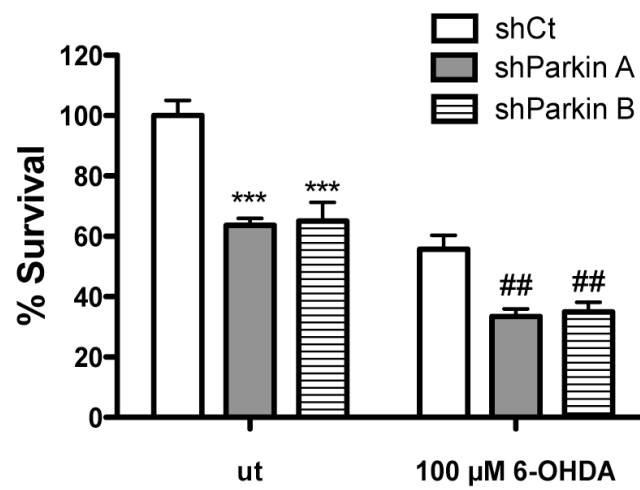

Supplement: cddis2014333x7.pdf [file cddis2014333x7.pdf]
