# Supplementary material for: Parkin loss of function contributes to RTP801 elevation and neurodegeneration in Parkinson's disease
Source: PubMed Central journal article supplement (PMC4454308; doi:10.1038/cddis.2014.333), 2014-08-07
Supplement: cddis2014333x9.pdf [file cddis2014333x9.pdf]

| ID | DISEASE STATUS | MUTATION                                      | GENDER | AGE AT SKIN PUNCH BIOPSY | AGE ONSET OF THE DISEASE |
|----|----------------|-----------------------------------------------|--------|--------------------------|--------------------------|
| 1  | CONTROL        | none                                          | male   | 66                       | -                        |
| 2  | CONTROL        | none                                          | female | 48                       | -                        |
| 3  | CONTROL        | none                                          | female | 47                       | -                        |
| 4  | CONTROL        | none                                          | male   | 52                       | -                        |
| 5  | CONTROL        | none                                          | female | 63                       | -                        |
| 6  | CONTROL        | none                                          | male   | 42                       | -                        |
| 7  | AR-JP          | Homozygous PARK2 ex3del*                      | male   | 49                       | 25                       |
| 8  | AR-JP          | Homozygous PARK2 ex2-4del*                    | male   | 69                       | 35                       |
| 9  | AR-JP          | Compound homozygous PARK2 205-206del2/ex6del* | female | 44                       | 32                       |
| 10 | AR-JP          | Homozygous PARK2 ex5-6del*                    | female | 63                       | 27                       |
| 11 | AR-JP          | Compound homozygous CRG ex1del/PARK2 ex6del*  | male   | 35                       | 9                        |
| 12 | AR-JP          | Compound homozygous PARK2 ex2dup/ex6del*      | male   | 49                       | 15                       |

**Table 1. Human fibroblasts donor information.  
(\*breakpoint not mapped)**
