# Supplementary material for: Parkin loss of function contributes to RTP801 elevation and neurodegeneration in Parkinson's disease
Source: PubMed Central journal article supplement (PMC4454308; doi:10.1038/cddis.2014.333), 2014-08-07
Supplement: cddis2014333x10.pdf [file cddis2014333x10.pdf]

| <b>PATIENT ID</b> | <b>MUTATION</b>                                  | <b>GENDER</b> | <b>AGE</b> | <b>TIME POST MORTEM (H)</b> |
|-------------------|--------------------------------------------------|---------------|------------|-----------------------------|
| CT 1              | -                                                | female        | 74         | 3:40                        |
| CT2               | -                                                | female        | 81         | 23:30                       |
| CT3               | -                                                | male          | 64         | 10:00                       |
| SPD1              | -                                                | male          | 81         | 5:00                        |
| SPD2              | -                                                | male          | 88         | 15:00                       |
| SPD3              | -                                                | male          | 77         | 12:00                       |
| PKM1              | simple heterozygous C255deletionA                | female        | 71         | 5:30                        |
| PKM2              | compound heterozygous exon 3-6 deletion 472 inst | female        | 75         | 6:30                        |

**Table 2. Human brain samples information**

CT1, CT2 and CT3: control individuals

SPD1, SPD2 and SPD3: sporadic PD patients

PKM1 and PKM2: Parkin heterozygous mutant PD patients
